# Supplementary material for: Psoriasis and Pulmonary Function - Unveiling Genetic Connections
Source: Research Square preprint supplement (doi:10.21203/rs.3.rs-4474529/v1), 2024-06-11
Supplement: Supplementary file 1 [file 7beb93127590e4370c6cdc92.docx]

Supplemental table 1 Evaluated psoriasis susceptibility loci reported in European ancestry and the associations with psoriasis in the UK Biobank

| SNP | Location  (GRCh38.p13) | Proxy |  | DA | MA | MAF | OR [95% CI] | q value |
| --- | --- | --- | --- | --- | --- | --- | --- | --- |
| rs4112788 | chr1:152578800 |  |  | G | A | 0.341 | **0.89 [0.84-0.94]** | **<0.001** |
| rs12118303 | chr1:172705957 |  |  | T | C | 0.178 | 1.04 [0.98-1.11] | 0.24 |
| rs41298997 | chr1:206481989 | rs17022427 |  | T | C | 0.237 | **1.10 [1.00-1.20]** | **0.039** |
| rs4649203 | chr1:24193430 |  |  | A | G | 0.266 | **0.92 [0.87-0.97]** | **0.003** |
| rs7536201 | chr1:24966593 | rs4265380 |  | T | C | 0.500 | **0.91 [0.84-0.99]** | **0.026** |
| rs2201841 | chr1:67228519 |  |  | A | G | 0.311 | **1.10 [1.01-1.19]** | **0.024** |
| rs34517439 | chr1:77984833 | rs17391694 |  | C | T | 0.136 | **1.23 [1.10-1.36]** | **<0.001** |
| rs11121129 | chr1:8208035 | rs72635708 |  | T | C | 0.259 | 1.08 [0.99-1.18] | 0.084 |
| rs17716942 | chr2:162404181 |  |  | T | C | 0.132 | **0.92 [0.86-0.99]** | **0.035** |
| rs702873 | chr2:60854407 |  |  | C | T | 0.429 | **0.89 [0.84-0.93]** | **<0.001** |
| rs10865331 | chr2:62324337 |  |  | G | A | 0.379 | **1.06 [1.01-1.12]** | **0.021** |
| rs7637230 | chr3:101944711 | rs4683950 |  | A | G | 0.197 | 0.92 [0.83-1.02] | 0.12 |
| rs4685408 | chr3:16954543 | rs13071645 |  | C | T | 0.482 | 1.00 [0.92-1.07] | 0.9 |
| rs20541 | chr5:132660272 |  |  | G | A | 0.180 | **0.91 [0.85-0.97]** | **0.004** |
| rs2082412 | chr5:159290781 |  |  | G | A | 0.195 | **0.78 [0.73-0.83]** | **<0.001** |
| rs114934997 | chr5:40370622 | rs56054640 |  | T | C | 0.089 | 0.92 [0.80-1.07] | 0.28 |
| rs27524 | chr5:96766240 |  |  | G | A | 0.393 | **1.09 [1.03-1.14]** | **0.001** |
| rs33980500 | chr6:111592059 |  |  | C | T | 0.075 | **1.27 [1.17-1.39]** | **<0.001** |
| rs610604 | chr6:137878280 |  |  | T | G | 0.326 | **1.08 [1.03-1.14]** | **0.004** |
| rs4712528 | chr6:20678199 | rs6908425 |  | C | T | 0.218 | 0.95 [0.86-1.04] | 0.28 |
| rs12191877 | chr6:31285148 |  |  | C | T | 0.120 | **2.48 [2.35-2.62]** | **<0.001** |
| rs2700987 | chr7:37346633 |  |  | A | C | 0.431 | 0.99 [0.94-1.04] | 0.58 |
| rs10979182 | chr9:108054739 | rs7029094 |  | T | C | 0.402 | 0.96 [0.89-1.04] | 0.31 |
| rs11795343 | chr9:32523739 | rs3205166 |  | T | G | 0.354 | 0.95 [0.87-1.03] | 0.23 |
| rs61871342 | chr10:100278884 | rs17729876 |  | G | A | 0.444 | **0.92 [0.85-1.00]** | **0.045** |
| rs2944542 | chr10:62610240 | rs10822037 |  | C | T | 0.407 | 0.97 [0.89-1.05] | 0.39 |
| rs2675662 | chr10:73839369 | rs2675671 |  | T | C | 0.451 | **0.87 [0.81-0.95]** | **0.001** |
| rs1250544 | chr10:79273128 |  |  | G | A | 0.383 | **0.93 [0.88-0.98]** | **0.006** |
| rs76959677 | chr10:88065014 | rs35484039 |  | G | A | 0.048 | 0.92 [0.76-1.11] | 0.38 |
| rs4561177 | chr11:110091706 | rs7113826 |  | T | G | 0.432 | 1.00 [0.92-1.09] | 0.97 |
| rs3802826 | chr11:128536543 | rs6590334 |  | C | T | 0.476 | 1.05 [0.97-1.14] | 0.22 |
| rs694739 | chr11:64329761 |  |  | A | G | 0.383 | 0.96 [0.91-1.01] | 0.14 |
| rs11053802 | chr12:10444608 | rs2617170 |  | C | T | 0.308 | 0.92 [0.84-1.00] | 0.051 |
| rs11059675 | chr12:122183779 | rs7972875 |  | C | T | 0.481 | **1.11 [1.02-1.20]** | **0.013** |
| rs2066808 | chr12:56344189 |  |  | A | G | 0.068 | **0.79 [0.71-0.88]** | **<0.001** |
| rs34394770 | chr13:39759232 | rs7993214 |  | C | T | 0.349 | 0.98 [0.90-1.07] | 0.675 |
| rs9533962 | chr13:44760058 | rs1415638 |  | C | T | 0.448 | **1.12 [1.04-1.22]** | **0.004** |
| rs8016947 | chr14:35363460 |  |  | G | T | 0.435 | **0.92 [0.87-0.97]** | **0.001** |
| rs142903734 | chr14:98202443 | rs17701905 |  | C | G | 0.211 | 0.98 [0.89-1.08] | 0.66 |
| rs367569 | chr16:11271643 | rs243325 |  | T | C | 0.304 | **0.86 [0.79-0.94]** | **0.001** |
| rs10782001 | chr16:30931304 |  |  | A | G | 0.362 | **1.05 [1.00-1.11]** | **0.048** |
| rs4795067 | chr17:27779649 |  |  | A | G | 0.352 | **1.09 [1.04-1.15]** | **<0.001** |
| rs963986 | chr17:42409561 | rs9252 |  | G | A | 0.090 | 1.03 [0.90-1.18] | 0.64 |
| rs55823223 | chr17:75894282 |  |  | G | A | 0.140 | 1.05 [0.98-1.12] | 0.17 |
| rs11652075 | chr17:80205094 |  |  | T | C | 0.499 | **1.10 [1.04-1.15]** | **<0.001** |
| rs559406 | chr18:12857003 | rs2847281 |  | A | G | 0.399 | 0.99 [0.91-1.08] | 0.88 |
| rs545979 | chr18:54293380 | rs602422 |  | A | G | 0.289 | **1.22 [1.13-1.33]** | **<0.001** |
| rs12720356 | chr19:10359299 |  |  | A | C | 0.097 | **0.83 [0.76-0.91]** | **<0.001** |
| rs892085 | chr19:10707416 | rs10407127 |  | T | G | 0.398 | 0.99 [0.91-1.07] | 0.84 |
| rs492602 | chr19:48703160 |  |  | G | A | 0.499 | **0.93 [0.89-0.98]** | **0.005** |
| rs495337 | chr20:49905793 |  |  | G | A | 0.424 | **0.93 [0.87-0.88]** | **0.003** |
| rs8128234 | chr21:35098568 | rs2242900 |  | A | G | 0.15 | 1.09 [0.98-1.22] | 0.1 |
| rs181359 | chr22:21574352 |  |  | G | A | 0.191 | **1.11 [1.05-1.18]** | **<0.001** |

Abbreviations: DA=Dominant allele, MA=Minor allele, MAF=Minor allele frequency, OR=Odds Ratio, CI=Confidence Interval

Supplemental table 2 The associations between psoriasis susceptibility loci and FEV1/FVC evaluated using an additive genetic model

| SNP | Location  (GRCh38.p13) |  | The UKBB | | | | |  | The BioVU | | | | |
| --- | --- | --- | --- | --- | --- | --- | --- | --- | --- | --- | --- | --- | --- |
|  | Proxy | MAF | beta | SE | q value |  | Proxy | MAF | beta | SE | q value |
| rs4112788 | chr1:152578800 |  |  | 0.341 | -0.017 | 0.018 | 0.35 |  |  | 0.35 | -0.105 | 0.428 | 0.81 |
| rs41298997 | chr1:206481989 |  | rs17022427 | 0.237 | -0.032 | 0.036 | 0.38 |  |  | 0.209 | -0.492 | 0.493 | 0.32 |
| rs4649203 | chr1:24193430 |  |  | 0.266 | -0.009 | 0.022 | 0.68 |  |  | 0.272 | 0.486 | 0.456 | 0.29 |
| rs7536201 | chr1:24966593 |  | rs4265380 | 0.500 | -0.002 | 0.023 | 0.92 |  | rs4265380 | 0.497 | 0.044 | 0.403 | 0.91 |
| rs2201841 | chr1:67228519 |  |  | 0.311 | 0.014 | 0.029 | 0.63 |  |  | 0.314 | 0.204 | 0.442 | 0.65 |
| rs34517439 | chr1:77984833 |  | rs17391694 | 0.136 | -0.081 | 0.06 | 0.18 |  |  | 0.121 | -0.133 | 0.609 | 0.83 |
| rs17716942 | chr2:162404181 |  |  | 0.132 | 0.02 | 0.04 | 0.61 |  |  | 0.145 | -0.011 | 0.006 | 0.061 |
| rs702873 | chr2:60854407 |  |  | 0.429 | -0.023 | 0.016 | 0.15 |  |  | 0.451 | 0.590 | 0.403 | 0.14 |
| rs10865331 | chr2:62324337 |  |  | 0.379 | 0.006 | 0.017 | 0.71 |  |  | 0.389 | 0.001 | 0.004 | 0.86 |
| rs20541 | chr5:132660272 |  |  | 0.180 | -0.058 | 0.031 | 0.059 |  |  | NA | NA | NA | NA |
| rs2082412 | chr5:159290781 |  |  | 0.195 | -0.004 | 0.029 | 0.88 |  |  | 0.209 | -0.427 | 0.503 | 0.4 |
| rs27524 | chr5:96766240 |  |  | 0.393 | -0.021 | 0.017 | 0.22 |  |  | 0.371 | 0.072 | 0.422 | 0.86 |
| rs33980500 | chr6:111592059 |  |  | 0.075 | -0.084 | 0.075 | 0.26 |  |  | 0.072 | 0.013 | 0.008 | 0.091 |
| rs610604 | chr6:137878280 |  |  | 0.326 | -0.027 | 0.019 | 0.14 |  |  | 0.330 | -0.667 | 0.424 | 0.12 |
| rs12191877 | chr6:31285148 |  |  | 0.120 | 0.036 | 0.047 | 0.44 |  |  | 0.123 | -1.032 | 0.652 | 0.11 |
| rs61871342 | chr10:100278884 |  | rs17729876 | 0.444 | -0.009 | 0.024 | 0.7 |  |  | 0.413 | 0 | 0.021 | 0.99 |
| rs2675662 | chr10:73839369 |  | rs2675671 | 0.451 | -0.025 | 0.024 | 0.29 |  | rs2675671 | 0.423 | **-0.823** | **0.405** | **0.042** |
| rs1250544 | chr10:79273128 |  |  | 0.383 | 0.015 | 0.017 | 0.39 |  |  | 0.369 | 0.255 | 0.414 | 0.54 |
| rs11059675 | chr12:122183779 |  | rs7972875 | 0.481 | -0.024 | 0.023 | 0.31 |  |  | NA | NA | NA | NA |
| rs2066808 | chr12:56344189 |  |  | 0.068 | 0.04 | 0.079 | 0.61 |  |  | NA | NA | NA | NA |
| rs9533962 | chr13:44760058 |  | rs1415638 | 0.448 | **-0.067** | **0.034** | **0.005** |  | rs1415638 | 0.411 | -0.758 | 0.404 | 0.061 |
| rs8016947 | chr14:35363460 |  |  | 0.435 | **-0.036** | **0.016** | **0.02** |  |  | 0.435 | 0 | 0.004 | 0.92 |
| rs367569 | chr16:11271643 |  | rs243325 | 0.304 | 0.041 | 0.03 | 0.16 |  | rs243325 | 0.291 | 0.28 | 0.453 | 0.54 |
| rs10782001 | chr16:30931304 |  |  | 0.362 | **-0.065** | **0.017** | **<0.001** |  |  | NA | NA | NA | NA |
| rs4795067 | chr17:27779649 |  |  | 0.352 | -0.008 | 0.018 | 0.65 |  |  | 0.358 | **-0.855** | **0.43** | **0.047** |
| rs11652075 | chr17:80205094 |  |  | 0.499 | 0.012 | 0.016 | 0.46 |  |  | 0.498 | **0.009** | **0.004** | **0.025** |
| rs545979 | chr18:54293380 |  | rs602422 | 0.289 | -0.015 | 0.031 | 0.63 |  | rs602422 | 0.297 | **-1.029** | **0.444** | **0.02** |
| rs12720356 | chr19:10359299 |  |  | 0.097 | **0.178** | **0.057** | **0.002** |  |  | 0.089 | -0.117 | 0.687 | 0.87 |
| rs492602 | chr19:48703160 |  |  | 0.499 | **0.099** | **0.015** | **<0.001** |  |  | 0.498 | -0.001 | 0.004 | 0.89 |
| rs495337 | chr20:49905793 |  |  | 0.424 | 0.02 | 0.016 | 0.21 |  |  | 0.417 | -0.141 | 0.411 | 0.73 |
| rs181359 | chr22:21574352 |  |  | 0.191 | -0.043 | 0.029 | 0.14 |  |  | 0.204 | 0.231 | 0.495 | 0.64 |

Abbreviations: The UKBB=the UK Biobank, the BioVU=Vanderbilt University Medical Center Biobank, FEV1=forced expiratory volume in one second, FVC=forced vital capacity, MAF=Minor allele frequency, SE=Standard error
